# Supplementary material for: Fast and Rigorous Computation of Gene and Pathway Scores from SNP-Based Summary Statistics
Source: PubMed Central journal article supplement (PMC4726509; doi:10.1371/journal.pcbi.1004714), 2016-01-25

original p-values

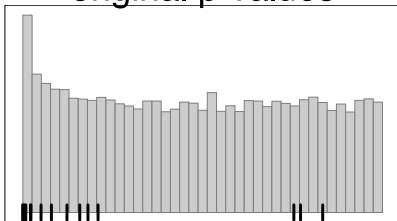

● Pathway Genes

$$F_{\chi_1^2}^{-1}(1 - p)$$

$$F_{\chi_1^2}^{-1}(1 - p_{rank})$$

empirical-strategy

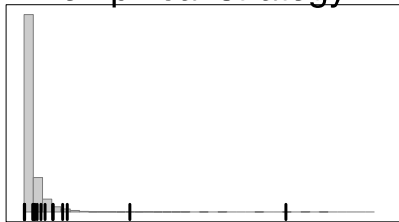

chi2-strategy

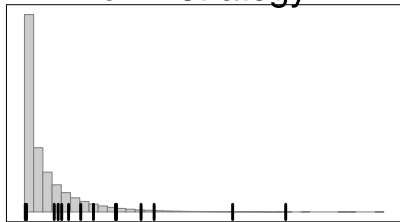

Supplement: pcbi.1004714.s001.pdf [file pcbi.1004714.s001.pdf]
