# Supplementary material for: Fast and Rigorous Computation of Gene and Pathway Scores from SNP-Based Summary Statistics
Source: PubMed Central journal article supplement (PMC4726509; doi:10.1371/journal.pcbi.1004714), 2016-01-25

**a** No genes fused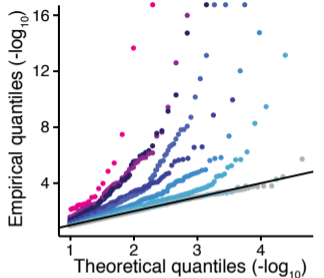**b** Proximal genes fused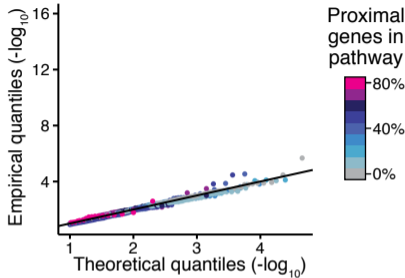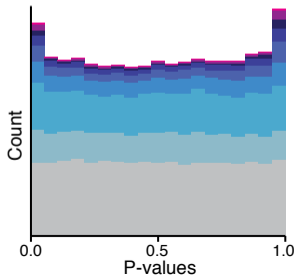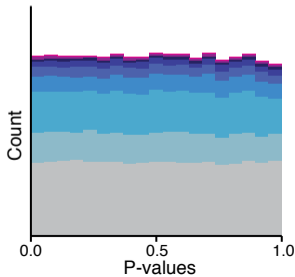

Supplement: pcbi.1004714.s004.pdf [file pcbi.1004714.s004.pdf]
