# Supplementary material for: Fast and Rigorous Computation of Gene and Pathway Scores from SNP-Based Summary Statistics
Source: PubMed Central journal article supplement (PMC4726509; doi:10.1371/journal.pcbi.1004714), 2016-01-25

**a****Overall**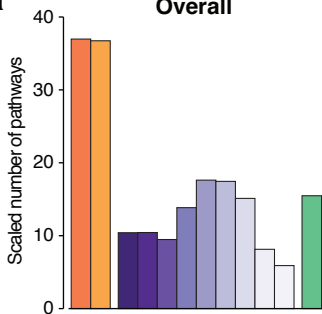**Pathway scoring method**

Pascal

Chi-square

Empirical

Parameter-free

Hypergeometric (MAGENTA)

20%

15%

10%

5%

2%

1%

0.5%

0.25%

0.1%

Cutoff parameter (fraction of genes considered significant)

Wilcoxon rank-sum test

**b****Lipids**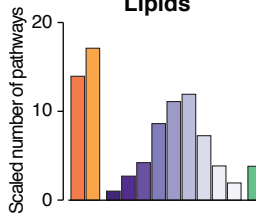**Glycemic**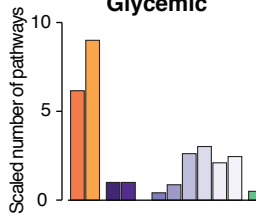**Cardiovascular**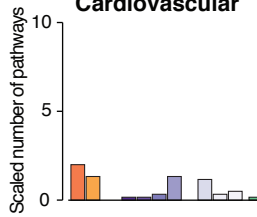**Neurodegenerative**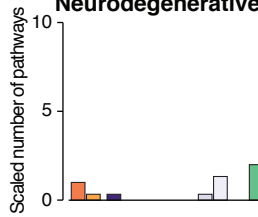**Immune-related**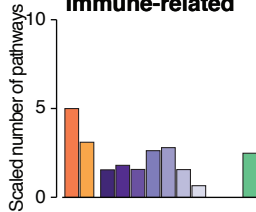**Anthropometric**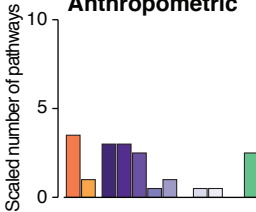**Psychiatric**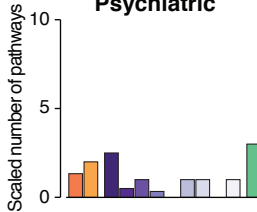**Others**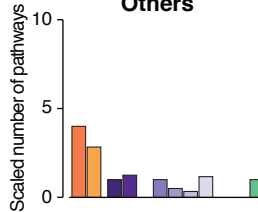

Supplement: pcbi.1004714.s006.pdf [file pcbi.1004714.s006.pdf]
