# Supplementary material for: Fast and Rigorous Computation of Gene and Pathway Scores from SNP-Based Summary Statistics
Source: PubMed Central journal article supplement (PMC4726509; doi:10.1371/journal.pcbi.1004714), 2016-01-25

Scaled Number of Pathways

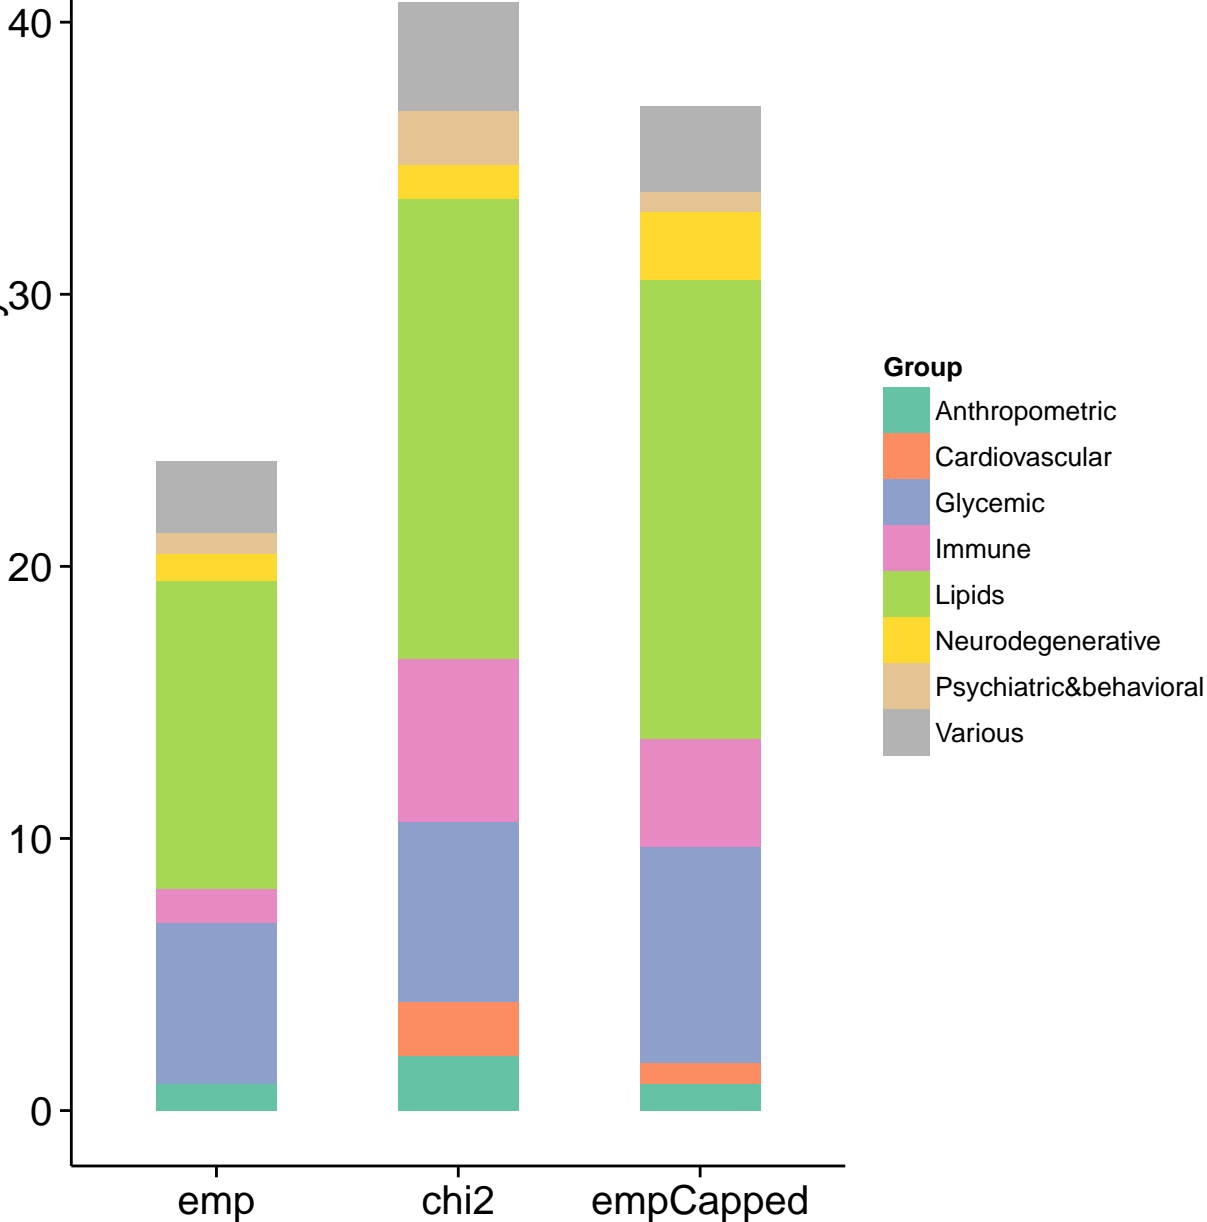

Supplement: pcbi.1004714.s009.pdf [file pcbi.1004714.s009.pdf]
